# Supplementary material for: Size and shape dependences of the adsorption kinetics of malachite green on nano-MgO: a theoretical and experimental study
Source: Royal Society of Chemistry journal article supplement (doi:10.1039/c9cp01279f), 2019-01-01
Supplement: c9cp01279f1.pdf [file c9cp01279f1.pdf]

# Size and Shape Dependences of Adsorption Kinetics of Malachite Green on Nano-MgO: a Theoretical and Experimental Study

Zixiang Cui\*, Jiayi Liu, Huifang Gao, Yongqiang Xue\*, Jie Hao, Rong  
Zhang, Boteng Ji, Jiaojiao Chen

Department of Chemistry, Taiyuan University of Technology, 030024  
Taiyuan, P. R. China

## (Supplementary Information)

The bar charts of size distribution are shown in Figure S1, and it can be observed that the size distribution is homogeneous.

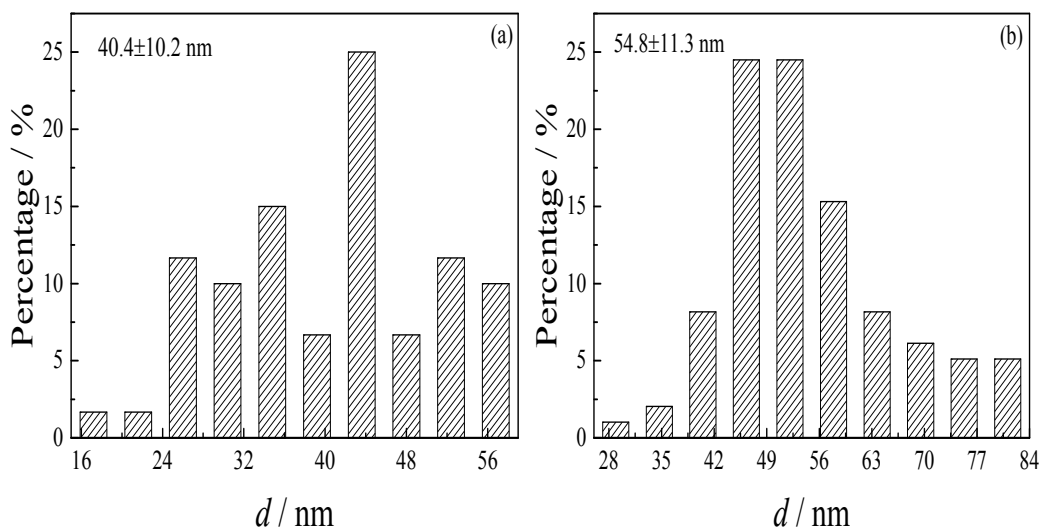

\* Corresponding authors.

E-mail addresses: czx1w2018@163.com (Z. Cui), xyqlw@126.com (Y. Xue)

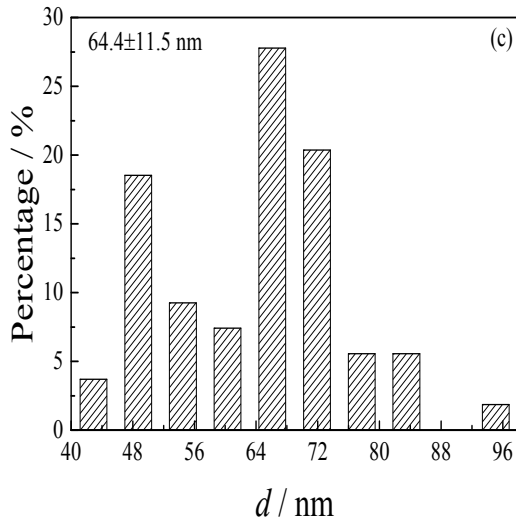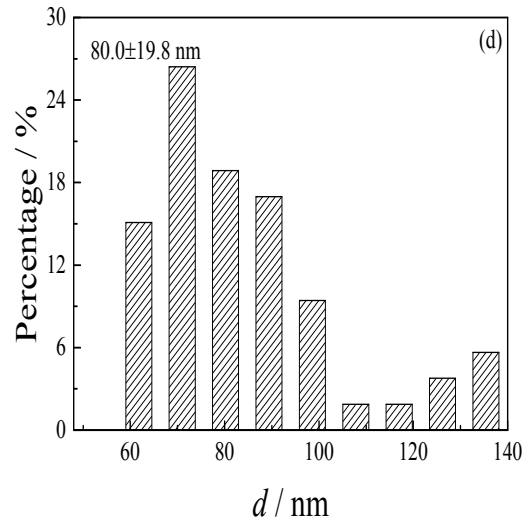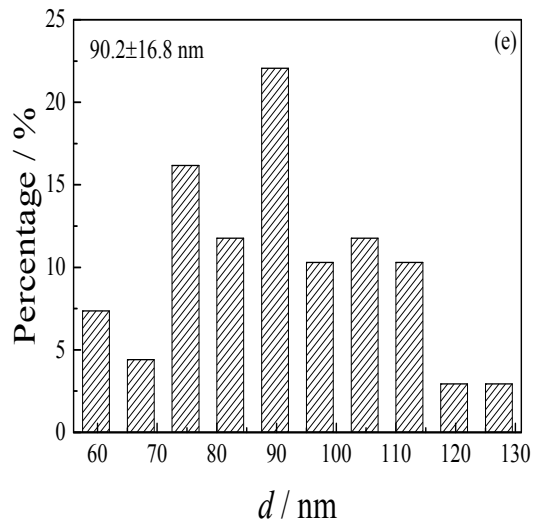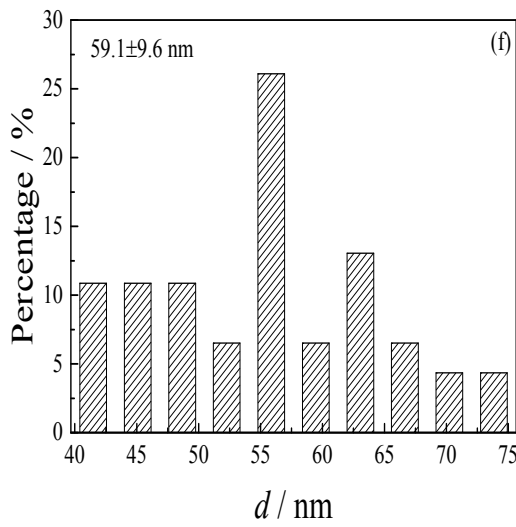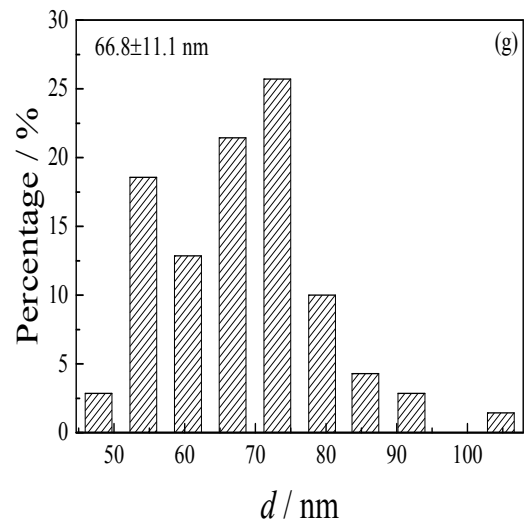

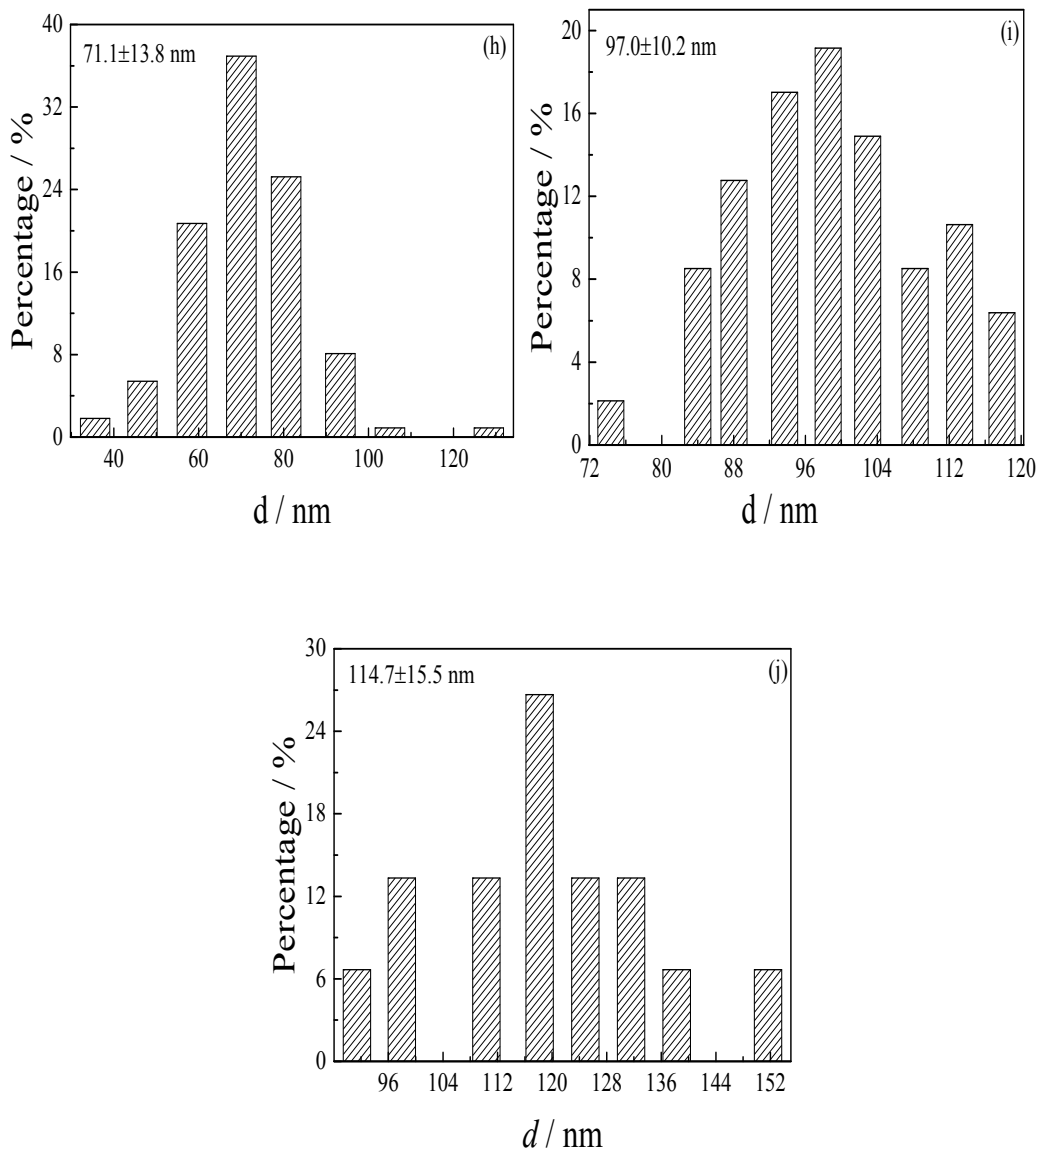

**Figure S1** The bar of equivalent particle size distribution of nano-MgO of spherical (a)-(e) and cubic (f)-(j) shapes.

The plots of  $q_t$  to  $t$  are shown in Figure S2, and the results are shown in Table S1.

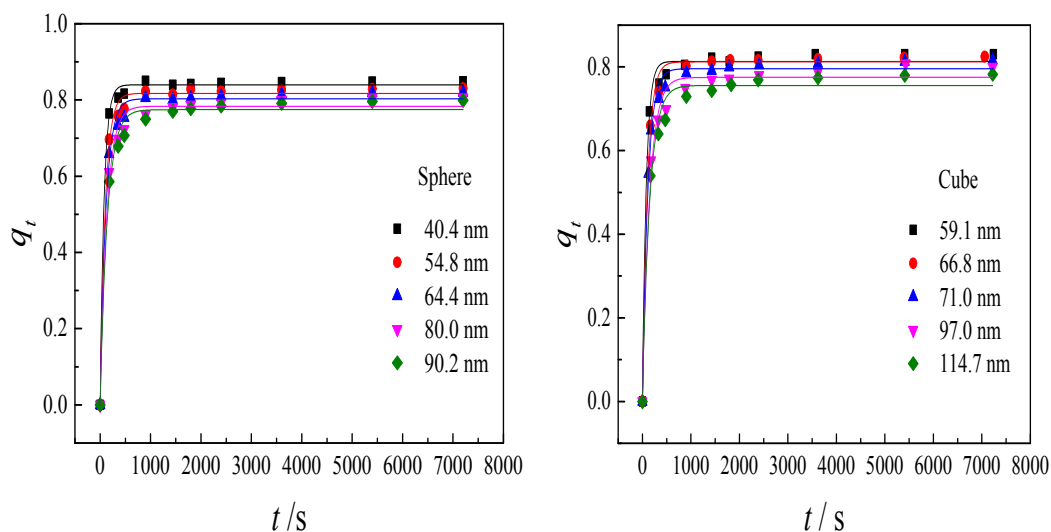

**Figure S2** The fit plots of pseudo-first-order kinetic equation for the adsorption of malachite green on nano-MgO with different particle sizes at 298 K.

**Table S1.** The correlation coefficient parameters of pseudo-first-order kinetic equation for the adsorption of malachite green on nano-MgO at 298 K.

| Sphere nano-MgO |                              | Cube nano-MgO |                              |
|-----------------|------------------------------|---------------|------------------------------|
| d/nm            | pseudo-first-order ( $R^2$ ) | d/nm          | pseudo-first-order ( $R^2$ ) |
| 40.4            | 0.9973                       | 59.1          | 0.9928                       |
| 54.8            | 0.9940                       | 66.8          | 0.9953                       |
| 64.4            | 0.9925                       | 71.0          | 0.9935                       |
| 80.0            | 0.9894                       | 97.0          | 0.9881                       |
| 90.2            | 0.9882                       | 114.7         | 0.9844                       |

As illustrated in Table S1, we found the nonlinear fitting for the pseudo-first-order kinetic equation with the correlation coefficients  $R^2 < 0.9998$ .
